# Supplementary material
Source: ML conference proceedings conference paper supplement (https://proceedings.mlr.press/v89/muecke19a.html)
Supplement: Supplementary file [file muecke19a-supp.pdf]

# Appendix

## Reducing training time by efficient localized kernel regression

### A Preliminaries

We let  $\mathcal{Z} = \mathcal{X} \times \mathbb{R}$  denote the sample space, where the input space  $\mathcal{X}$  is a standard Borel space endowed with a fixed unknown probability measure  $\nu$ . The kernel space  $\mathcal{H}$  is assumed to be separable, equipped with a measurable positive semi-definite kernel  $K$ , bounded by  $\kappa$ , implying continuity of the inclusion map  $I : \mathcal{H} \rightarrow L^2(\nu)$ . Moreover, we consider the covariance operator  $T = \kappa^{-2}I^*I = \kappa^{-2}\mathbb{E}[K_X \otimes K_X]$ , which can be shown to be positive self-adjoint trace class (and hence is compact). Given a sample  $\mathbf{x} = (x_1, \dots, x_n) \in \mathcal{X}^n$ , we define the sampling operator  $S_{\mathbf{x}} : \mathcal{H} \rightarrow \mathbb{R}^n$  by  $(S_{\mathbf{x}}f)_i = \langle f, K_{x_i} \rangle_{\mathcal{H}}$ . The empirical covariance operator is given by  $T_{\mathbf{x}} = \kappa^{-2}S_{\mathbf{x}}^*S_{\mathbf{x}} : \mathcal{H} \rightarrow \mathcal{H}$ .

For a partition  $\{\mathcal{X}_1, \dots, \mathcal{X}_m\}$  of  $\mathcal{X}$ , we denote by  $\hat{\mathcal{H}}_j$  the local RKHS with extended bounded kernel  $\hat{K}_j$ , supported on  $\mathcal{X}_j$ , with associated covariance operator  $T_j = \kappa_j^{-2}\mathbb{E}_{\nu_j}[\hat{K}_j(X, \cdot) \otimes \hat{K}_j(X, \cdot)]$ . Given a sample  $\mathbf{x}_j = (x_{j,1}, \dots, x_{j,n_j}) \in \mathcal{X}_j^{n_j}$ , we define the sampling operator  $S_{\mathbf{x}_j} : \hat{\mathcal{H}}_j \rightarrow \mathbb{R}^{n_j}$  similarly by  $(S_{\mathbf{x}_j}f)_i = \langle f, \hat{K}_j(x_i, \cdot) \rangle_{\hat{\mathcal{H}}_j}$ .

The global covariance operator acts as an operator on the direct sum  $\mathcal{H} = \hat{\mathcal{H}}_1 \oplus \dots \oplus \hat{\mathcal{H}}_m$ . According to (8), it decomposes as

$$T = \sum_{j=1}^m p_j^{-1}T_j,$$

which can be used to prove that the global effective dimension can be expressed as the sum of the (rescaled) local ones.

**Lemma 1** (Effective Dimension). *For any  $\lambda \in [0, 1]$*

$$\sum_{j=1}^m \mathcal{N}(T_j, p_j\lambda) = \mathcal{N}(T, \lambda).$$

Finally, our error decomposition relies on the the following standard decomposition

**Lemma 2.** *Given  $j \in [m]$  let  $p_j = \nu(\mathcal{X}_j)$  and  $\nu_j(A) = \nu(A|\mathcal{X}_j)$ , for a measurable  $A \subset \mathcal{X}$ . One has*

$$L^2(\mathcal{X}, \nu) = \bigoplus_{j=1}^m p_j L^2(\mathcal{X}_j, \nu_j)$$

with

$$\|f\|_{L^2(\nu)}^2 = \sum_{j=1}^m p_j \|f_j\|_{L^2(\nu_j)}^2,$$

where  $f = f_1 + \dots + f_m$ .

For proving our results we additionally need an appropriate Bernstein condition on the noise.

**Assumption 1** (Distributions). 1. The sampling is random i.i.d., where each observation point  $(X_i, Y_i)$  follows the model  $Y = f_\rho(X) + \epsilon$ , and the noise satisfies the following Bernstein-type assumption: For any integer  $k \geq 2$  and some  $\sigma > 0$  and  $M > 0$ :

$$\mathbb{E}[|Y - f_\rho(X)|^k | X] \leq \frac{1}{2}k! \sigma^2 M^{k-2} \quad \nu - \text{a.s.} \quad (\text{Bern}(M, \sigma))$$

2. Given  $\theta = (M, \sigma, R) \in \mathbb{R}_+^3$ , the class  $\mathcal{M} := \mathcal{M}(\theta, r, b)$  consists of all distributions  $\rho$  with  $X$ -marginal  $\nu$  and conditional distribution of  $Y$  given  $X$  satisfying  $(\text{Bern}(M, \sigma))$  for the deviations and (10) for the mean.

We remark that point 1 implies for any  $j \in [m]$

$$\mathbb{E}[|Y - f_j(X)|^k | X] \leq \frac{1}{2}k! \sigma^2 M^{k-2} \quad \nu_j - \text{a.s.}, \quad (1)$$

where  $\sigma$  and  $M$  are uniform with respect to  $m$  and  $k$ . This is what we actually need in our proofs.

For ease of reading we make use of the following conventions:

- we are interested in a precise dependence of multiplicative constants on the parameter  $\sigma, M, R, m, n$
- the dependence of multiplicative constants on various other parameters, including the kernel parameter  $\kappa$ , the parameters arising from the regularization method,  $b > 1, r > 0$ , etc. will (generally) be omitted
- the value of  $C$  might change from line to line
- the expression “for  $n$  sufficiently large” means that the statement holds for  $n \geq n_0$ , with  $n_0$  potentially depending on all model parameters (including  $\sigma, M$  and  $R$ ).

## B Proofs of Section 3

This section is devoted to proving the results of Section 3. Recall that by Assumption 2 the regression function belongs to  $\mathcal{H}$ , i.e. admits an unique representation  $f = f_1 + \dots + f_m$ , with  $f_j \in \hat{\mathcal{H}}_j$ . For proving our error bounds we shall use a classical bias-variance decomposition

$$f_\rho - \hat{f}_D^\lambda = \sum_{j=1}^m f_j - \hat{f}_{D_j}^\lambda = \sum_{j=1}^m r_\lambda(T_{\mathbf{x}_j}) f_j + \sum_{j=1}^m g_\lambda(T_{\mathbf{x}_j}) (T_{\mathbf{x}_j} f_j - S_{\mathbf{x}_j}^* \mathbf{y}_j),$$

where  $\hat{f}_D^\lambda$  is given in (9), with  $r_\lambda(t) = 1 - g_\lambda(t)t$  and with  $g_\lambda(t) = (t + \lambda)^{-1}$ . The final error bound follows then from

$$\begin{aligned} \mathbb{E} \left[ \mathcal{E}(f_\rho) - \mathcal{E}(\hat{f}_D^\lambda) \right] &= \mathbb{E} \left[ \|f_\rho - \hat{f}_D^\lambda\|_{L^2(\nu)}^2 \right] \\ &\leq \mathbb{E} \left[ \left\| \sum_{j=1}^m r_\lambda(T_{\mathbf{x}_j}) f_j \right\|_{L^2(\nu)}^2 \right] + \mathbb{E} \left[ \left\| \sum_{j=1}^m g_\lambda(T_{\mathbf{x}_j}) (T_{\mathbf{x}_j} f_j - S_{\mathbf{x}_j}^* \mathbf{y}_j) \right\|_{L^2(\nu)}^2 \right]. \end{aligned} \quad (2)$$

We proceed by bounding each term in the above decomposition separately.

**Proposition 1** (Approximation Error). *For any  $\lambda \in (0, 1]$ , one has*

$$\mathbb{E} \left[ \left\| \sum_{j=1}^m r_\lambda(T_{\mathbf{x}_j}) f_j \right\|_{L^2(\nu)}^2 \right] \leq CR^2 \sum_{j=1}^m p_j \mathcal{B}_{n_j}^2(T_j, \lambda) \lambda^{2(r_j + \frac{1}{2})},$$

where  $\mathcal{B}_{n_j}^2(T_j, \lambda)$  is defined in Proposition 9 and where  $C$  does not depend on  $(\sigma, M, R) \in \mathbb{R}_+^3$ .

*Proof of Proposition 1.* Recall<sup>1</sup> that  $\|\sqrt{T_j} f\|_{\hat{\mathcal{H}}_j} = \|f\|_{L^2(\nu_j)}$  for any  $f \in \hat{\mathcal{H}}_j$ . According to Lemma 2, by Assumption 10 we have

$$\begin{aligned} \mathbb{E} \left[ \left\| \sum_{j=1}^m r_\lambda(T_{\mathbf{x}_j}) f_j \right\|_{L^2(\nu)}^2 \right] &= \sum_{j=1}^m p_j \mathbb{E} \left[ \left\| r_\lambda(T_{\mathbf{x}_j}) f_j \right\|_{L^2(\nu_j)}^2 \right] \\ &= \sum_{j=1}^m p_j \mathbb{E} \left[ \left\| \sqrt{T_j} r_\lambda(T_{\mathbf{x}_j}) f_j \right\|_{\hat{\mathcal{H}}_j}^2 \right] \\ &\leq CR^2 \sum_{j=1}^m p_j \mathbb{E} \left[ \left\| \sqrt{T_j} r_\lambda(T_{\mathbf{x}_j}) T_j^{r_j} \right\|^2 \right]. \end{aligned} \quad (3)$$

We bound for any  $j \in [m]$  the expectation by first deriving a probabilistic estimate. For any  $\eta \in (0, 1]$ , with probability at least  $1 - \eta$

$$\begin{aligned} \left\| \sqrt{T_j} r_\lambda(T_{\mathbf{x}_j}) T_j^{r_j} \right\| &\leq C \log^2(2\eta^{-1}) \mathcal{B}_{n_j}(T_j, \lambda) \|(T_j + \lambda)^{\frac{1}{2}}\| \|(T_{\mathbf{x}_j} + \lambda)^{\frac{1}{2}} r_\lambda(T_{\mathbf{x}_j})(T_{\mathbf{x}_j} + \lambda)^{r_j}\| \|(T_j + \lambda)^{r_j} T_j^{r_j}\| \\ &\leq C \log^2(2\eta^{-1}) \mathcal{B}_{n_j}(T_j, \lambda) \lambda^{r_j + \frac{1}{2}}. \end{aligned}$$

Here we have used that

$$\|(T_{\mathbf{x}_j} + \lambda)^{\frac{1}{2}} r_\lambda(T_{\mathbf{x}_j})(T_{\mathbf{x}_j} + \lambda)^{r_j}\| \leq C \lambda^{r_j + \frac{1}{2}}$$

and that for  $s \in [0, \frac{1}{2}]$

$$\|(T_j + \lambda)^s T_j^s\| \leq \|(T_j + \lambda) T_j\|^s \leq 1$$

by Proposition 10 and the spectral theorem. Also, from Proposition 10 and Proposition 9

$$\|(T_{\mathbf{x}_j} + \lambda)^{-\frac{1}{2}} (T_j + \lambda)^{\frac{1}{2}}\| \leq \|(T_{\mathbf{x}_j} + \lambda)^{-1} (T_j + \lambda)\|^{\frac{1}{2}} \leq \sqrt{8} \log(2\eta^{-1}) \mathcal{B}_{n_j}^{\frac{1}{2}}(T_j, \lambda).$$

From Lemma 7, by integration

$$\mathbb{E} \left[ \left\| \sqrt{T_j} r_\lambda(T_{\mathbf{x}_j}) T_j^{r_j} \right\|^2 \right] \leq C \mathcal{B}_{n_j}^2(T_j, \lambda) \lambda^{2(r_j + \frac{1}{2})}.$$

Combining this with (3) finishes the proof.  $\square$

**Proposition 2** (Sample Error). *For any  $\lambda \in (0, 1]$ , one has*

$$\mathbb{E} \left[ \left\| \sum_{j=1}^m g_\lambda(T_{\mathbf{x}_j}) (T_{\mathbf{x}_j} f_j - S_{\mathbf{x}_j}^* \mathbf{y}_j) \right\|_{L^2(\nu)}^2 \right] \leq C \sum_{j=1}^m p_j \mathcal{B}_{n_j}^2(T_j, \lambda) \lambda \left( \frac{M}{n_j \lambda} + \sigma \sqrt{\frac{\mathcal{N}(T_j, \lambda)}{n_j \lambda}} \right)^2,$$

where  $\mathcal{B}_{n_j}^2(T_j, \lambda)$  is defined in Proposition 9 and  $C$  does not depend on  $(\sigma, M, R) \in \mathbb{R}_+^3$ .

<sup>1</sup>If  $I_j : \hat{\mathcal{H}}_j \hookrightarrow L^2(\nu_j)$ , then  $T_j = I_j^* I_j$  and  $\|\sqrt{T_j} f\|_{\hat{\mathcal{H}}_j}^2 = \langle T_j f, f \rangle_{\hat{\mathcal{H}}_j} = \langle I_j f, I_j f \rangle_{L^2(\nu_j)} = \|f\|_{L^2(\nu_j)}^2$ . Here, we identify  $I_j f = f$ .

*Proof of Proposition 2.* Using again  $\|\sqrt{T_j}f\|_{\hat{\mathcal{F}}_j} = \|f\|_{L^2(\nu_j)}$  we find with Lemma 2

$$\begin{aligned} \mathbb{E}\left[\left\|\sum_{j=1}^m g_\lambda(T_{\mathbf{x}_j})(T_{\mathbf{x}_j}f_j - S_{\mathbf{x}_j}^*\mathbf{y}_j)\right\|_{L^2(\nu)}^2\right] &= \sum_{j=1}^m p_j \mathbb{E}\left[\left\|g_\lambda(T_{\mathbf{x}_j})(T_{\mathbf{x}_j}f_j - S_{\mathbf{x}_j}^*\mathbf{y}_j)\right\|_{L^2(\nu_j)}^2\right] \\ &= \sum_{j=1}^m p_j \mathbb{E}\left[\left\|\sqrt{T_j}g_\lambda(T_{\mathbf{x}_j})(T_{\mathbf{x}_j}f_j - S_{\mathbf{x}_j}^*\mathbf{y}_j)\right\|_{\hat{\mathcal{F}}_j}^2\right]. \end{aligned} \quad (4)$$

We bound the expectation for each separate subsample of size  $n_j$  by first deriving a probabilistic estimate and then by integration. For this reason, we use (16) and Proposition 10 and write for any  $f_j \in \hat{\mathcal{F}}_j$ ,  $j \in [m]$

$$\begin{aligned} \|\sqrt{T_j}f_j\|_{\hat{\mathcal{F}}_j} &\leq \|\sqrt{T_j}(T_j + \lambda)^{-1/2}\| \|(T_j + \lambda)^{1/2}(T_{\mathbf{x}_j} + \lambda)^{-1/2}\| \|(T_{\mathbf{x}_j} + \lambda)^{1/2}f_j\|_{\hat{\mathcal{F}}_j} \\ &\leq \|T_j(T_j + \lambda)^{-1}\|^{1/2} \|(T_j + \lambda)(T_{\mathbf{x}_j} + \lambda)^{-1}\|^{1/2} \|(T_{\mathbf{x}_j} + \lambda)^{1/2}f_j\|_{\hat{\mathcal{F}}_j} \\ &\leq C \log(4\eta^{-1}) \mathcal{B}_{n_j}^{1/2}(T_j, \lambda) \|(T_{\mathbf{x}_j} + \lambda)^{1/2}f_j\|_{\hat{\mathcal{F}}_j}, \end{aligned} \quad (5)$$

holding with probability at least  $1 - \frac{\eta}{2}$ .

We proceed by splitting

$$(T_{\mathbf{x}_j} + \lambda)^s g_\lambda(T_{\mathbf{x}_j})(T_{\mathbf{x}_j}f_\rho - S_{\mathbf{x}_j}^*\mathbf{y}_j) = H_{\mathbf{x}_j}^{(1)} \cdot H_{\mathbf{x}_j}^{(2)} \cdot h_{\mathbf{z}_j}^\lambda, \quad (6)$$

with

$$\begin{aligned} H_{\mathbf{x}_j}^{(1)} &:= (T_{\mathbf{x}_j} + \lambda)^{\frac{1}{2}} g_\lambda(T_{\mathbf{x}_j})(T_{\mathbf{x}_j} + \lambda)^{\frac{1}{2}}, \\ H_{\mathbf{x}_j}^{(2)} &:= (T_{\mathbf{x}_j} + \lambda)^{-\frac{1}{2}} (T + \lambda)^{\frac{1}{2}}, \\ h_{\mathbf{z}_j}^\lambda &:= (T + \lambda)^{-\frac{1}{2}} (T_{\mathbf{x}_j}f_\rho - S_{\mathbf{x}_j}^*\mathbf{y}_j). \end{aligned}$$

The first term is bounded. The second term is now estimated using (16) once more. One has with probability at least  $1 - \frac{\eta}{4}$

$$H_{\mathbf{x}_j}^{(2)} \leq \sqrt{8} \log(8\eta^{-1}) \mathcal{B}_{\frac{n}{m}}(T_j, \lambda)^{\frac{1}{2}}.$$

Finally,  $h_{\mathbf{z}_j}^\lambda$  is estimated using Proposition 8:

$$h_{\mathbf{z}_j}^\lambda \leq 2 \log(8\eta^{-1}) \left( \frac{M}{n_j \sqrt{\lambda}} + \sigma \sqrt{\frac{\mathcal{N}(T_j, \lambda)}{n_j}} \right),$$

holding with probability at least  $1 - \frac{\eta}{4}$ . Thus, combining the estimates following (6) with (5) gives for any  $j \in [m]$

$$\|\sqrt{T_j}g_\lambda(T_{\mathbf{x}_j})(T_{\mathbf{x}_j}f_\rho - S_{\mathbf{x}_j}^*\mathbf{y}_j)\|_{\hat{\mathcal{F}}_j} \leq C \log^3(8\eta^{-1}) \mathcal{B}_{n_j}(T_j, \lambda) \sqrt{\lambda} \left( \frac{M}{n_j \lambda} + \sigma \sqrt{\frac{\mathcal{N}(T_j, \lambda)}{n_j \lambda}} \right),$$

with probability at least  $1 - \eta$ . By integration using Lemma 7 one obtains

$$\mathbb{E}\left[\left\|\sqrt{T_j}g_\lambda(T_{\mathbf{x}_j})(T_{\mathbf{x}_j}f_\rho - S_{\mathbf{x}_j}^*\mathbf{y}_j)\right\|_{\hat{\mathcal{F}}_j}^2\right]^{\frac{1}{2}} \leq C \mathcal{B}_{n_j}(T_j, \lambda) \sqrt{\lambda} \left( \frac{M}{n_j \lambda} + \sigma \sqrt{\frac{\mathcal{N}(T_j, \lambda)}{n_j \lambda}} \right).$$

Combining this with (4) implies

$$\mathbb{E}\left[\left\|\sum_{j=1}^m g_\lambda(T_{\mathbf{x}_j})(T_{\mathbf{x}_j}f_j - S_{\mathbf{x}_j}^*\mathbf{y}_j)\right\|_{L^2(\nu)}^2\right] \leq C \sum_{j=1}^m p_j \mathcal{B}_{n_j}^2(T_j, \lambda) \lambda \left( \frac{M}{n_j \lambda} + \sigma \sqrt{\frac{\mathcal{N}(T_j, \lambda)}{n_j \lambda}} \right)^2,$$

where  $C$  does not depend on  $(\sigma, M, R) \in \mathbb{R}_+^3$ .  $\square$

We are now ready to prove Theorem 1.

*Proof of Theorem 1.* Let the regularization parameter  $\lambda_n$  be chosen as

$$\lambda_n = \min \left( 1, \left( \frac{\sigma^2}{R^2 n} \right)^{\frac{1}{2r+1+\gamma}} \right), \quad (7)$$

with  $r = \min(r_1, \dots, r_m)$  and assume that  $n_j = \lfloor \frac{n}{m} \rfloor$ . Note that by Lemma 5 we have  $\mathcal{B}_{\frac{n}{m}}(T_j, \lambda_n) \leq 2$  for any  $j \in [m]$ , provided  $n > n_0$ , with  $n_0$  given by (17). Since  $\lambda_n^{r_j} \leq \lambda_n^r$  for any  $j \in [m]$ , the approximation error bound becomes by Proposition 1

$$\begin{aligned} \mathbb{E} \left[ \left\| \sum_{j=1}^m r_{\lambda_n}(T_{\mathbf{x}_j}) f_j \right\|_{L^2(\nu)}^2 \right] &\leq CR^2 \sum_{j=1}^m p_j \lambda_n^{2(r_j + \frac{1}{2})} \\ &\leq CR^2 \lambda_n^{2(r + \frac{1}{2})}, \end{aligned} \quad (8)$$

where we also used that  $\sum_j p_j = 1$ .

For estimating the sample error firstly observe that

$$\frac{Mm}{n\lambda_n} \leq R\lambda_n^r$$

if

$$n > \left( m \frac{M}{R} \right)^{\frac{2r+1+\gamma}{r+\gamma}} \left( \frac{R}{\sigma} \right)^{\frac{2(r+1)}{r+\gamma}} =: n_1.$$

Thus, from Proposition 2 we obtain (recalling again that  $\mathcal{B}_{\frac{n}{m}}(T_j, \lambda_n) \leq 2$ )

$$\mathbb{E} \left[ \left\| \sum_{j=1}^m g_{\lambda_n}(T_{\mathbf{x}_j})(T_{\mathbf{x}_j} f_j - S_{\mathbf{x}_j}^* \mathbf{y}_j) \right\|_{L^2(\nu)}^2 \right] \leq C\lambda_n \sum_{j=1}^m p_j \left( R\lambda_n^r + \sigma \sqrt{\frac{m\mathcal{N}(T_j, \lambda_n)}{n\lambda_n}} \right)^2. \quad (9)$$

We proceed by applying  $(a+b)^2 \leq 2(a^2 + b^2)$ . Observe that by our Assumption 3, 2.

$$\begin{aligned} \sum_{j=1}^m p_j \sigma^2 \frac{m\mathcal{N}(T_j, \lambda_n)}{n\lambda_n} &= \sigma^2 \frac{m}{n\lambda_n} \sum_{j=1}^m p_j \mathcal{N}(T_j, \lambda_n) \\ &\leq C \frac{\sigma^2}{n\lambda_n} \mathcal{N}(T, m\lambda_n) \\ &\leq Cm^{-\gamma} \frac{\sigma^2}{n\lambda_n} \lambda_n^{-\gamma} \\ &\leq CR\lambda_n^r, \end{aligned} \quad (10)$$

by definition of  $\lambda_n$ . Finally, combining (2) with (10), (9) and (8) proves the theorem, provided

$$n > \max(n_0, n_1) \geq C_{M,\sigma,R,\gamma,r} m^{1+\frac{\gamma+1}{2r}}, \quad (11)$$

for some (explicitly given)  $C_{M,\sigma,R,\gamma,r} < \infty$ .  $\square$

*Proof of Theorem 2.* Assume that  $n_j = \lfloor \frac{n}{m} \rfloor$ . Let the regularization parameter  $\lambda_n$  be given by (15). As above, Lemma 5 yields  $\mathcal{B}_{\frac{n}{m}}(T_j, \lambda_n) \leq 2$  provided  $n > n_0$ , with  $n_0$  satisfying (17) (with  $r$  replaced by  $r_h$ ). From Proposition 1 we immediately obtain for the approximation error

$$\begin{aligned} \mathbb{E} \left[ \left\| \sum_{j=1}^m r_{\lambda_n}(T_{\mathbf{x}_j}) f_j \right\|_{L^2(\nu)}^2 \right] &\leq C \left( R_l^2 \left( \sum_{j \in E} p_j \right) \lambda_n^{2(r_l + \frac{1}{2})} + R_h^2 \left( \sum_{j \in E^c} p_j \right) \lambda_n^{2(r_h + \frac{1}{2})} \right) \\ &\leq C R_h^2 \lambda_n^{2(r_h + \frac{1}{2})}. \end{aligned}$$

Here we have used that by Assumption 4

$$\left( \sum_{j \in E} p_j \right) \leq \left( \frac{R_h}{R_l} \right)^2 \lambda_n^{2(r_h - r_l)} \quad \text{and} \quad \left( \sum_{j \in E^c} p_j \right) \leq 1.$$

The bound for the sample error follows exactly as in the proof of Theorem 1. Finally, the error bound (17) is obtained by using again (2).  $\square$

## C Proofs of Section 4

For proving Theorem 3 we use the non-asymptotic error decomposition given in Theorem 2 of [4], somewhat reformulated and streamlined using our estimate (16). We adopt the notation and idea of [4] and write  $\hat{f}_{n,l}^\lambda = g_{\lambda,l}(T_{\mathbf{x}}) S_{\mathbf{x}}^* \mathbf{y}$ , with  $g_{\lambda,l}(T_{\mathbf{x}}) = V(V^* T_{\mathbf{x}} V + \lambda)^{-1} V^*$  and  $VV^* = P_l$ , the projection operator onto  $\mathcal{H}_l$ ,  $l \leq n$ . Consider

$$\|\sqrt{T}(\hat{f}_{n,l}^\lambda - f_\rho)\|_{\mathcal{H}} \leq T_1 + T_2$$

with

$$T_1 = \|g_{\lambda,l}(T_{\mathbf{x}})(S_{\mathbf{x}}^* \mathbf{y} - T_{\mathbf{x}} f_\rho)\|_{L^2(\nu)} = \|\sqrt{T} g_{\lambda,l}(T_{\mathbf{x}})(S_{\mathbf{x}}^* \mathbf{y} - T_{\mathbf{x}} f_\rho)\|_{\mathcal{H}}$$

and

$$T_2 = \|\sqrt{T} g_{\lambda,l}(T_{\mathbf{x}})(T_{\mathbf{x}} f_\rho - f_\rho)\|_{\mathcal{H}},$$

which we bound in Proposition 3 and Proposition 4.

**Proposition 3** (Expectation Sample Error KRLS-Nyström).

$$\mathbb{E} \left[ \left\| g_{\lambda,l}(T_{\mathbf{x}})(S_{\mathbf{x}}^* \mathbf{y} - T_{\mathbf{x}} f_\rho) \right\|_{L^2(\nu)}^2 \right]^{\frac{1}{2}} \leq C \sqrt{\lambda} \mathcal{B}_n(T, \lambda) \left( \frac{M}{n\lambda} + \sigma \sqrt{\frac{\mathcal{N}(T, \lambda)}{n\lambda}} \right)$$

where  $C$  does not depend on  $(\sigma, M, R) \in \mathbb{R}_+^3$ .

*Proof of Proposition 3.* For estimating  $T_1$  we use Proposition 9 and obtain for any  $\lambda \in (0, 1]$  with probability at least  $1 - \eta$

$$\begin{aligned} T_1 &\leq C \log(2\eta^{-1}) \mathcal{B}_n(T, \lambda) \|(T_{\mathbf{x}} + \lambda)^{1/2} g_{\lambda,l}(T_{\mathbf{x}})(S_{\mathbf{x}}^* \mathbf{y} - T_{\mathbf{x}} f_\rho)\|_{\mathcal{H}} \\ &\leq C \log^2(4\eta^{-1}) \mathcal{B}_n^2(T, \lambda) \|(T_{\mathbf{x}} + \lambda)^{1/2} g_{\lambda,l}(T_{\mathbf{x}})(T_{\mathbf{x}} + \lambda)^{1/2}\| \\ &\quad \|(T_{\mathbf{x}} + \lambda)^{-1/2} (S_{\mathbf{x}}^* \mathbf{y} - T_{\mathbf{x}} f_\rho)\|_{\mathcal{H}}. \end{aligned}$$

From Proposition 6 in [4] and from the spectral Theorem we obtain

$$\|(T_{\mathbf{x}} + \lambda)^{1/2} g_{\lambda,l}(T_{\mathbf{x}})(T_{\mathbf{x}} + \lambda)^{1/2}\| \leq 1.$$

Thus, applying Proposition 7 one has with probability at least  $1 - \eta$

$$T_1 \leq C \log^3(8\eta^{-1}) \sqrt{\lambda} \mathcal{B}_n^2(T, \lambda) \left( \frac{M}{n\lambda} + \sigma \sqrt{\frac{\mathcal{N}(T, \lambda)}{n\lambda}} \right),$$

where  $C$  does not depend on  $(\sigma, M, R) \in \mathbb{R}_+^3$ . Integration using Lemma 7 gives the result.  $\square$

Before we proceed we introduce the computational error: For  $u \in [0, \frac{1}{2}]$ ,  $\lambda \in (0, 1]$  define

$$\mathcal{C}_u(l, \lambda) := \|(Id - VV^*)(T + \lambda)^u\|.$$

The proof of the following Lemma can be found in [4], Proof of Theorem 2.

**Lemma 3.** For any  $u \in [0, \frac{1}{2}]$

$$\mathcal{C}_u(l, \lambda) \leq \mathcal{C}_{\frac{1}{2}}(l, \lambda)^{2u}.$$

**Lemma 4.** If  $\lambda_n$  is defined by (12) and if

$$l_n \geq n^\beta \quad \beta > \frac{\gamma + 1}{2r + 1 + \gamma}$$

one has with probability at least  $1 - \eta$

$$\mathcal{C}_{\frac{1}{2}}(l_n, \lambda_n) \leq C \log(2\eta^{-1}) \sqrt{\lambda_n},$$

provided  $n$  is sufficiently large.

*Proof of Lemma 4.* Using Proposition 3 in [4] one has with probability at least  $1 - \eta$

$$\begin{aligned} \mathcal{C}_{\frac{1}{2}}(l, \lambda_n) &\leq \sqrt{\lambda_n} \|(T_{\mathbf{x}_l} + \lambda_n)^{-1}(T + \lambda_n)\|^{\frac{1}{2}} \\ &\leq C \log(2\eta^{-1}) \sqrt{\lambda_n} \mathcal{B}_l^{\frac{1}{2}}(T, \lambda_n). \end{aligned}$$

Recall that  $\mathcal{N}(T, \lambda) \leq C_b \lambda^{-\frac{1}{b}}$ , implying

$$\mathcal{B}_l(T, \lambda_n) \leq C \left( 1 + \left( \frac{2}{l\lambda_n} + \sqrt{\frac{\lambda_n^{-\gamma}}{l\lambda_n}} \right)^2 \right).$$

Straightforward calculation shows that

$$\frac{2}{l_n \lambda_n} = o(1), \quad \text{if } l_n \geq n^\beta, \beta > \frac{1}{2r + 1 + \gamma}$$

and

$$\sqrt{\frac{\lambda_n^{-\gamma}}{l_n \lambda_n}} = o(1), \quad \text{if } l_n \geq n^\beta, \beta > \frac{\gamma + 1}{2r + 1 + \gamma}.$$

Thus,  $\mathcal{C}_{\frac{1}{2}}(l_n, \lambda_n) \leq C \log(2\eta^{-1}) \sqrt{\lambda_n}$ , with probability at least  $1 - \eta$ .  $\square$

**Proposition 4** (Expectation Approximation- and Computational Error KRLS-Nyström). *Assume that*

$$l_n \geq n^\beta, \quad \beta > \frac{\gamma + 1}{2r + 1 + \gamma}$$

and  $(\lambda_n)_n$  is chosen according to (12). If  $n$  is sufficiently large

$$\mathbb{E} \left[ \left\| \sqrt{T} g_{\lambda_n, l_n}(T_{\mathbf{x}})(T_{\mathbf{x}} f_\rho - f_\rho) \right\|_{L^2(\nu)}^2 \right]^{\frac{1}{2}} \leq C a_n,$$

where  $C$  does not depend on  $(\sigma, M, R) \in \mathbb{R}_+^3$ .

*Proof of Proposition 4.* Using that  $\|T^{-r}f_\rho\|_{\mathcal{H}} \leq R$  one has for any  $\lambda \in (0, 1]$

$$T_2 \leq CR ( (a) + (b) + (c) ) , \quad (12)$$

with

$$(a) = \|\sqrt{T}(Id - VV^*)T^r\| , \quad (b) = \lambda\|\sqrt{T}g_{\lambda,l}(T_{\mathbf{x}})T^r\|$$

and

$$(c) = \|\sqrt{T}g_{\lambda,l}(T_{\mathbf{x}})(T_{\mathbf{x}} + \lambda)(Id - VV^*)T^r\| .$$

Since  $(Id - VV^*)^2 = (Id - VV^*)$  we obtain by Lemma 3

$$(a) \leq \mathcal{C}_{\frac{1}{2}}(l, \lambda) \mathcal{C}_r(l, \lambda) \leq \mathcal{C}_{\frac{1}{2}}(l, \lambda)^{2r+1} .$$

Furthermore, using (16) , with probability at least  $1 - \frac{\eta}{2}$

$$\begin{aligned} (b) &\leq C \log^2(8\eta^{-1})\lambda \mathcal{B}_n^{\frac{1}{2}+r}(T, \lambda) \|(T_{\mathbf{x}} + \lambda)^{1/2}g_{\lambda,l}(T_{\mathbf{x}})(T_{\mathbf{x}} + \lambda)^r\| \\ &\leq C \log^2(8\eta^{-1})\lambda^{\frac{1}{2}+r} \mathcal{B}_n^{\frac{1}{2}+r}(T, \lambda) , \end{aligned}$$

by again using Proposition 6 in [4].

The last term gives with probability at least  $1 - \frac{\eta}{2}$

$$\begin{aligned} (c) &\leq C \log(8\eta^{-1})\|(T_{\mathbf{x}} + \lambda)^{1/2}g_{\lambda,l}(T_{\mathbf{x}})(T_{\mathbf{x}} + \lambda)\| \mathcal{C}_r(l, \lambda) \\ &\leq C \log(8\eta^{-1})\sqrt{\lambda} \mathcal{C}_{\frac{1}{2}}(l, \lambda)^{2r} . \end{aligned}$$

Combining the estimates for (a), (b) and (c) gives

$$T_2 \leq CR \log^2(8\eta^{-1}) \left( \mathcal{C}_{\frac{1}{2}}(l, \lambda)^{2r+1} + \lambda^{\frac{1}{2}+r} \mathcal{B}_n^{\frac{1}{2}+r}(T, \lambda) + \sqrt{\lambda} \mathcal{C}_{\frac{1}{2}}(l, \lambda)^{2r} \right) .$$

We now choose  $\lambda_n$  according to (12) . Notice that by Lemma 6 one has  $\mathcal{B}_n(T, \lambda_n) \leq C$  for any  $n$  sufficiently large. Applying Lemma 4 we obtain, with probability at least  $1 - \eta$

$$T_2 \leq C \log^2(8\eta^{-1}) R \lambda_n^{r+\frac{1}{2}} ,$$

provided  $n$  is sufficiently large and

$$l_n \geq n^\beta , \quad \beta > \frac{\gamma + 1}{2r + 1 + \gamma} .$$

The result follows from integration by applying Lemma 7 and recalling that  $a_n = R \lambda_n^{r+\frac{1}{2}}$  .  $\square$

With these preparations we can now prove the main result of Section 4.

*Proof of Theorem 3.* The proof easily follows by combining Proposition 3 and Proposition 4 . In particular, the estimate for the sample error by choosing  $\lambda = \lambda_n$  follows by recalling that  $\mathcal{N}(T, \lambda_n) \leq C_\gamma \lambda_n^{-\gamma}$ , by definition of  $(a_n)_n$  in Theorem 3 , by Lemma 6 and by

$$\frac{M}{n\lambda_n} = o\left(\sigma \sqrt{\frac{\lambda_n^{-\gamma}}{n\lambda_n}}\right) .$$

$\square$

## D Proofs of Section 5

Following the lines in the previous sections we divide the error analysis in bounding the Sample error, Approximation error and Computational error.

**Proposition 5** (Sample Error). *Let  $\lambda_n$  be defined as in (12). We have*

$$\mathbb{E}\left[\left\|\sum_{j=1}^m g_{\lambda_n, l}(T_{\mathbf{x}_j})(T_{\mathbf{x}_j} \hat{f}_j - S_{\mathbf{x}_j}^* \mathbf{y}_j)\right\|_{L^2(\nu)}^2\right] \leq CR^2 \left(\frac{\sigma^2}{R^2 n}\right)^{\frac{2(r+\frac{1}{2})}{2r+1+\gamma}},$$

where  $n$  has to be chosen sufficiently large, i.e.

$$n > C_{\sigma, R, \gamma, r} m^{1+\frac{\gamma+1}{2r+1+\gamma}},$$

for some  $C_{\sigma, R, \gamma, r} < \infty$ . Moreover,  $C$  does not depend on the model parameter  $\sigma, M, R \in \mathbb{R}_+^3$ .

*Proof of Proposition 5.* Applying Proposition 3 we obtain

$$\begin{aligned} \mathbb{E}\left[\left\|\sum_{j=1}^m g_{\lambda, l}(T_{\mathbf{x}_j})(T_{\mathbf{x}_j} \hat{f}_j - S_{\mathbf{x}_j}^* \mathbf{y}_j)\right\|_{L^2(\nu)}^2\right] &= \sum_{j=1}^m p_j \mathbb{E}\left[\left\|g_{\lambda, l}(T_{\mathbf{x}_j})(T_{\mathbf{x}_j} \hat{f}_j - S_{\mathbf{x}_j}^* \mathbf{y}_j)\right\|_{L^2(\nu_j)}^2\right] \\ &\leq C \sum_{j=1}^m p_j \mathcal{B}_{\frac{n}{m}}^2(T_j, \lambda) \lambda \left(\frac{Mm}{n\lambda} + \sigma \sqrt{\frac{m\mathcal{N}(T_j, \lambda)}{n\lambda}}\right)^2. \end{aligned}$$

Arguing as in the proof of Theorem 1, using Lemma 5, implies the result.  $\square$

**Proposition 6** (Approximation and Computational Error). *Let  $\lambda_n$  be defined by (12). Assume the number of subsampled points satisfies  $l_n \geq n^\beta$  with*

$$\beta > \frac{\gamma + 1}{2r + \gamma + 1}.$$

Then

$$\mathbb{E}\left[\left\|\sum_{j=1}^m g_{\lambda_n, l_n}(T_{\mathbf{x}_j})(T_{\mathbf{x}_j} f_j - f_j)\right\|_{L^2(\nu)}^2\right] \leq CR^2 \left(\frac{\sigma^2}{R^2 n}\right)^{\frac{2(r+\frac{1}{2})}{2r+\gamma+1}},$$

where  $C$  does not depend on the model parameter  $\sigma, M, R$ .

*Proof of Proposition 6.* For proving this Proposition we combine techniques from both the partitioning and subsampling approach. More precisely:

$$\begin{aligned} \mathbb{E}\left[\left\|\sum_{j=1}^m g_{\lambda_n, l_n}(T_{\mathbf{x}_j})(T_{\mathbf{x}_j} f_j - f_j)\right\|_{L^2(\nu)}^2\right] &= \sum_{j=1}^m p_j \mathbb{E}\left[\left\|g_{\lambda_n, l_n}(T_{\mathbf{x}_j})(T_{\mathbf{x}_j} f_j - f_j)\right\|_{L^2(\nu_j)}^2\right] \\ &= \sum_{j=1}^m p_j \mathbb{E}\left[\left\|\sqrt{T_j} g_{\lambda_n, l_n}(T_{\mathbf{x}_j})(T_{\mathbf{x}_j} f_j - f_j)\right\|_{\hat{\mathcal{C}}_j}^2\right]. \end{aligned}$$

We shall decompose as in (12), with  $T$  replaced by  $T_j$  and  $T_{\mathbf{x}}$  replaced by  $T_{\mathbf{x}_j}$ ,

$$\left\|\sqrt{T_j} g_{\lambda_n, l_n}(T_{\mathbf{x}_j})(T_{\mathbf{x}_j} \hat{f}_j - f_j)\right\|_{\hat{\mathcal{C}}_j} \leq CR \left( (a) + (b) + (c) \right) = (*).$$

Following the lines of the proof of Proposition 4 leads to an upper bound (with probability at least  $1 - \eta$ ) for the rhs of the last inequality, which is

$$\begin{aligned} (*) &\leq CR \log^2(8\eta^{-1}) \left( \mathcal{C}_{\frac{1}{2}}(l, \lambda_n)^{2r+1} + \lambda_n^{\frac{1}{2}+r} \mathcal{B}_{\frac{n}{m}}^{\frac{1}{2}+r}(T_j, \lambda_n) + \sqrt{\lambda_n} \mathcal{C}_{\frac{1}{2}}(l, \lambda_n)^{2r} \right) \\ &\leq CR \log^2(8\eta^{-1}) \lambda_n^{r+\frac{1}{2}} \left( \mathcal{B}_l^{2r+1}(T_j, \lambda_n) + \mathcal{B}_{\frac{n}{m}}^{r+\frac{1}{2}}(T_j, \lambda_n) + \mathcal{B}_l^{2r}(T_j, \lambda_n) \right). \end{aligned}$$

Thus, by integration and since  $r \leq \frac{1}{2}$

$$\mathbb{E} \left[ \left\| \sum_{j=1}^m g_{\lambda_n, l_n}(T_{\mathbf{x}_j})(T_{\mathbf{x}_j} f_j - f_j) \right\|_{L^2(\nu)}^2 \right] \leq CR^2 \lambda_n^{2(r+\frac{1}{2})} \sum_{j=1}^m p_j \left( \mathcal{B}_l^4(T_j, \lambda_n) + \mathcal{B}_{\frac{2n}{m}}^2(T_j, \lambda_n) + \mathcal{B}_l^2(T_j, \lambda_n) \right).$$

Note that by Lemma 5, if

$$n \geq C_{\sigma, R, \gamma, r} m^{1+\frac{\gamma+1}{2r}} \quad (13)$$

we have

$$\begin{aligned} \mathcal{B}_{\frac{n}{m}}(T_j, \lambda_n) &= \left[ 1 + \left( \frac{2m}{n\lambda_n} + \sqrt{\frac{m_n \mathcal{N}(T_j, \lambda_n)}{n\lambda}} \right)^2 \right] \\ &\leq C \left[ 1 + \left( \frac{2m}{n\lambda_n} \right) + \left( \frac{m\mathcal{N}(T_j, \lambda_n)}{n\lambda} \right) \right] \\ &\leq C. \end{aligned}$$

Moreover, since  $\mathcal{N}(T_j, \lambda_n) \leq \mathcal{N}(T, \lambda_n/p_j)$ , by Assumption 3, 2. and since  $p_j \leq 1$

$$\mathcal{B}_{l_n}(T_j, \lambda_n) \leq 1 + \left( \frac{2}{l_n \lambda_n} + \sigma \sqrt{\frac{\lambda_n^{-\gamma}}{l_n \lambda_n}} \right)^2.$$

Straightforward calculation shows that

$$\frac{2}{l_n \lambda_n} = o(1), \quad \text{if } l_n \geq n^{\beta'}, \quad \beta' > \frac{1}{2r + \gamma + 1}$$

and

$$\sqrt{\frac{\lambda_n^{-\gamma}}{l_n \lambda_n}} = \mathcal{O}(1), \quad \text{if } l_n \geq n^{\beta'}, \quad \beta' \geq \frac{\gamma + 1}{2r + \gamma + 1}. \quad (14)$$

Thus, (14) ensures  $\mathcal{B}_{l_n}(T_j, \lambda_n) = \mathcal{O}(1)$ . Finally, on each local set we have the requirement  $l_n \lesssim \frac{n}{m_n}$ , which is implied by

$$l_n \lesssim n^{1-\alpha} \sim n^{\frac{\gamma+1}{2r+\gamma+1}}.$$

Together with (14) we get a sharp bound

$$l_n \sim n^{\frac{\gamma+1}{2r+\gamma+1}}.$$

□

## E Probabilistic Inequalities

In this section we recall some well-known probabilistic inequalities.

**Proposition 7** ([2]). *For  $n \in \mathbb{N}$ ,  $\lambda \in (0, 1]$  and  $\eta \in (0, 1]$ , one has with probability at least  $1 - \eta$ :*

$$\left\| (T + \lambda)^{-\frac{1}{2}} (T_{\mathbf{x}} f_{\rho} - S_{\mathbf{x}}^* \mathbf{y}) \right\|_{\mathcal{H}} \leq 2 \log(2\eta^{-1}) \left( \frac{M}{n\sqrt{\lambda}} + \sigma \sqrt{\frac{\mathcal{N}(T, \lambda)}{n}} \right).$$

**Proposition 8** ([2], Proposition 5.3). *For any  $\lambda \in (0, 1]$  and  $\eta \in (0, 1)$  one has with probability at least  $1 - \eta$ :*

$$\left\| (T + \lambda)^{-1} (T - T_{\mathbf{x}}) \right\|_{HS} \leq 2 \log(2\eta^{-1}) \left( \frac{2}{n\lambda} + \sqrt{\frac{\mathcal{N}(T, \lambda)}{n\lambda}} \right).$$

**Proposition 9** ([3]). *Define*

$$\mathcal{B}_n(T, \lambda) := \left[ 1 + \left( \frac{2}{n\lambda} + \sqrt{\frac{\mathcal{N}(T, \lambda)}{n\lambda}} \right)^2 \right] \quad (15)$$

For any  $\lambda > 0$ ,  $\eta \in (0, 1]$ , with probability at least  $1 - \eta$  one has

$$\|(T_{\mathbf{x}} + \lambda)^{-1}(T + \lambda)\| \leq 8 \log^2(2\eta^{-1}) \mathcal{B}_n(T, \lambda). \quad (16)$$

**Lemma 5.** *Let  $m \in \mathbb{N}$  and  $\lambda_n$  be defined by (12). Then for any  $j \in [m]$  and  $n > n_0$*

$$\mathcal{B}_{\frac{n}{m}}(T_j, \lambda_n) \leq 2.$$

Here,  $n_0$  depends on the number  $m$  of subsets and the model parameter  $R, \sigma, \gamma, r$  and is explicitly given in (17).

*Proof of Lemma 5.* Recall that we assume  $\mathcal{N}(T, \lambda) \leq C_\gamma \lambda^{-\gamma}$ , for some  $b \geq 1$ ,  $C_\gamma < \infty$ . Thus, by Lemma 1 we have for any  $j \in [m]$

$$\mathcal{N}(T_j, \lambda) \leq \mathcal{N}(T, \lambda/p_j) \leq C_\gamma p_j^{-\gamma} \lambda^{-\gamma}$$

and thus

$$\frac{m\mathcal{N}(T_j, \lambda_n)}{n\lambda_n} \leq C_\gamma p_j^{-\gamma} \frac{m}{n} \lambda_n^{-(1+\gamma)} < \frac{1}{2},$$

provided

$$n > (2C_\gamma p_j m)^{\frac{2r+\gamma+1}{2r}} \left( \frac{R}{\sigma} \right)^{\frac{2(\gamma+1)}{2r}}.$$

Moreover,

$$\frac{2m}{n\lambda_n} < \frac{1}{2},$$

provided

$$n > (4m)^{\frac{2r+\gamma+1}{2r+1}} \left( \frac{R}{\sigma} \right)^{\frac{2}{2r+\gamma}}.$$

Finally, setting  $p_{\max} = \max(p_1, \dots, p_m)$ , if

$$n > n_0 := (4m)^{\frac{2r+\gamma+1}{2r}} \max \left( (R/\sigma)^{\frac{2}{2r+\gamma}}, (p_{\max} C_\gamma)^{\frac{2r+\gamma+1}{2r}} (R/\sigma)^{\frac{2(\gamma+1)}{2r}} \right) \quad (17)$$

we have

$$\mathcal{B}_{\frac{n}{m}}(T_j, \lambda_n) \leq 1 + \left( \frac{1}{2} + \frac{1}{2} \right)^2 = 2,$$

uniformly for any  $j \in [m]$ . □

**Lemma 6.** *If  $\lambda_n$  is defined by (12)*

$$\mathcal{B}_n(T, \lambda_n) \leq 2,$$

*provided  $n$  is sufficiently large.*

*Proof of Lemma 6.* The proof is a straightforward calculation using Definition (12) and recalling that  $\mathcal{N}(T, \lambda) \leq C_\gamma \lambda^{-\gamma}$ . □

## F Miscellanea

**Proposition 10** (Cordes Inequality,[1], Theorem IX.2.1-2). *Let  $A, B$  be two bounded, self-adjoint and positive operators on a Hilbert space. Then for any  $s \in [0, 1]$ :*

$$\|A^s B^s\| \leq \|AB\|^s . \tag{18}$$

**Lemma 7.** *Let  $X$  be a non-negative random variable with  $\mathbb{P}[X > C \log^u(k\eta^{-1})] < \eta$  for any  $\eta \in (0, 1]$ . Then  $\mathbb{E}[X] \leq \frac{C}{k} u \Gamma(u)$ .*

*Proof.* Apply  $\mathbb{E}[X] = \int_0^\infty \mathbb{P}[X > t] dt$ . □

## References

- [1] R. Bhatia. *Matrix Analysis*. Springer, 1997.
- [2] G. Blanchard and N. Mücke. Optimal rates for regularization of statistical inverse learning problems. *Foundations of Computational Mathematics*, 2017. doi:10.1007/s10208-017-9359-7.
- [3] Z.-C. Guo, S.-B. Lin, and D.-X. Zhou. Learning theory of distributed spectral algorithms. *Inverse Problems*, 33(7):074009, 2017.
- [4] A. Rudi, R. Camoriano, and L. Rosasco. Less is more: Nyström computational regularization. *Advances in Neural Information Processing Systems 28*, 2015.
